# Supplementary material
Source: publisher site journal article supplement (https://www.dovepress.com/article/467150)
Supplement: Supplementary file 1 [file get_supplementary_file.php]

## Supplementary Information

**Supplementary Figure 1.** The evaluation of the SOR interference on the lateral view of the DCG images

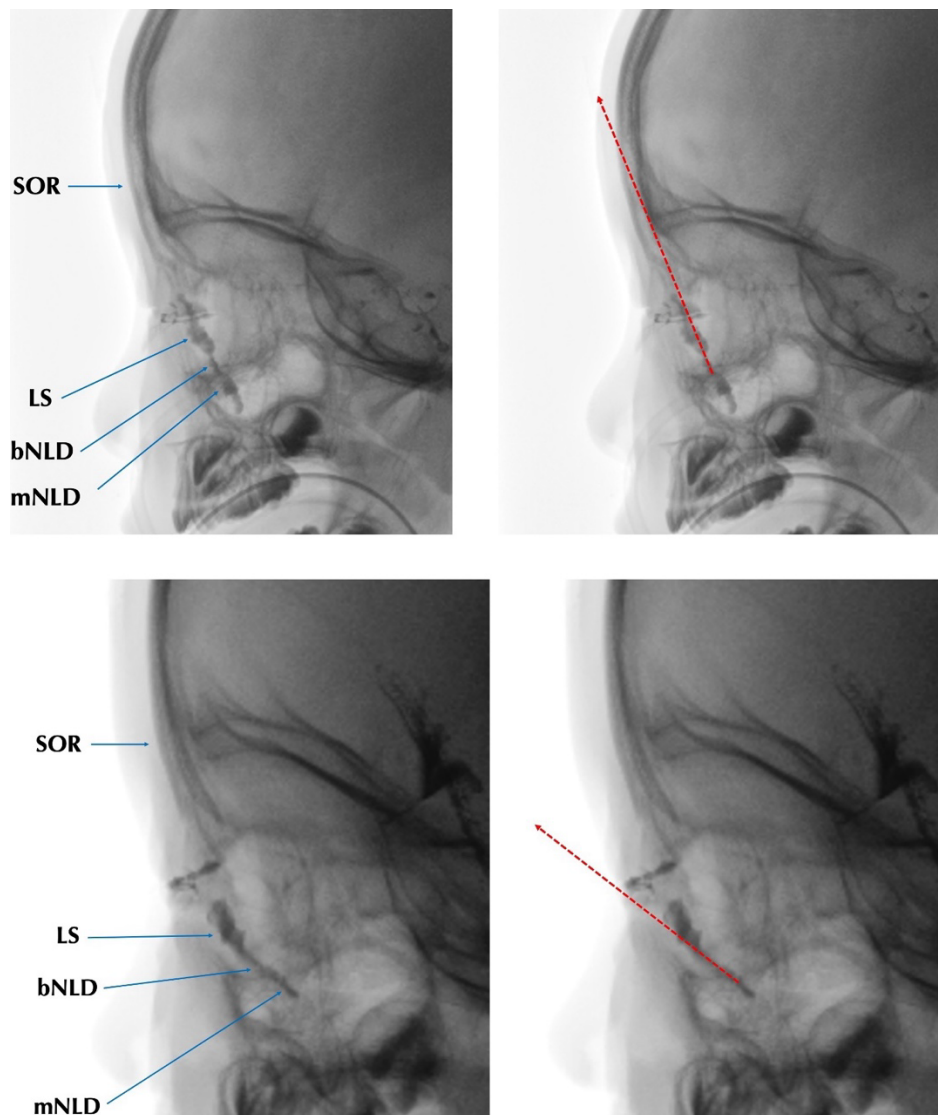

Passing a straight probe through the NLD is anticipated to be challenging when the anteriorly extended path of the bNLD interferes with the SOR on the lateral view of the DCG images (upper figure). Among the 64 cases in our study, 16 (25%) encountered this specific interference. Abbreviations: LS, lacrimal sac; bNLD, bony nasolacrimal duct; mNLD, membranous nasolacrimal duct; SOR, superior orbital rim

**Supplementary Figure 2.** Limitations associated with a straight-probe procedure

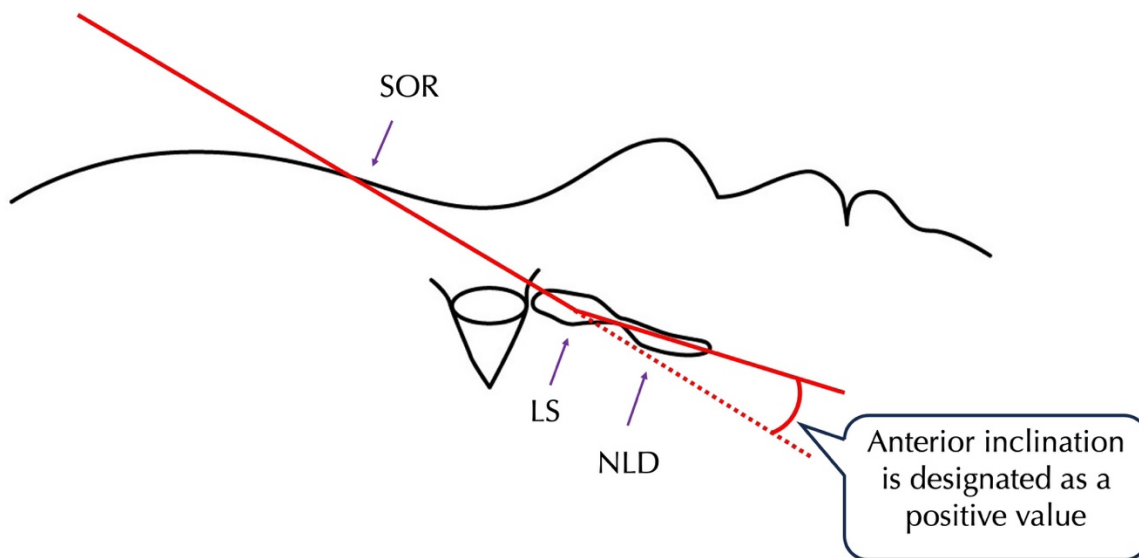

A SOR–LS–NLD angle with a positive value poses challenges for a straight probe passing through the bNLD due to interference from the SOR. This interference was observed in 25% of cases among patients with CNLDO in this study, indicating the potential benefit of using a probe with a curved or bent tip for procedures in such cases. Additionally, 75% of patients exhibited a SOR–LS–NLD angle of less than  $0^\circ$ , indicating the feasibility of passing the bNLD with a straight probe without SOR interference. Abbreviations: LS, lacrimal sac; NLD, nasolacrimal duct; SOR, superior orbital rim

**Supplementary Figure 3. Q-Q plots of the investigated parameters**

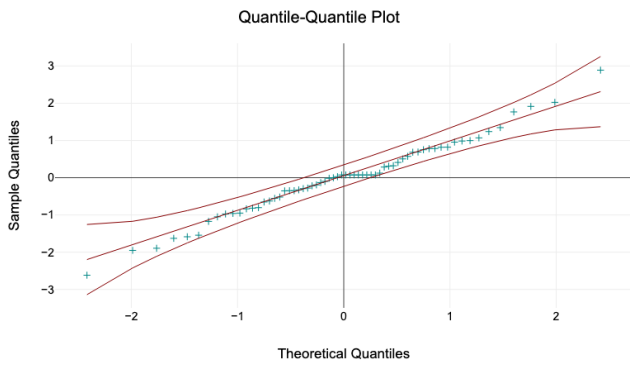

**Q-Q plot of the Lateral LS-NLD angle**

|                |        |
|----------------|--------|
| Mean           | -1.23  |
| Std. Deviation | 16.54  |
| Minimum        | -44.55 |
| Maximum        | 46.55  |

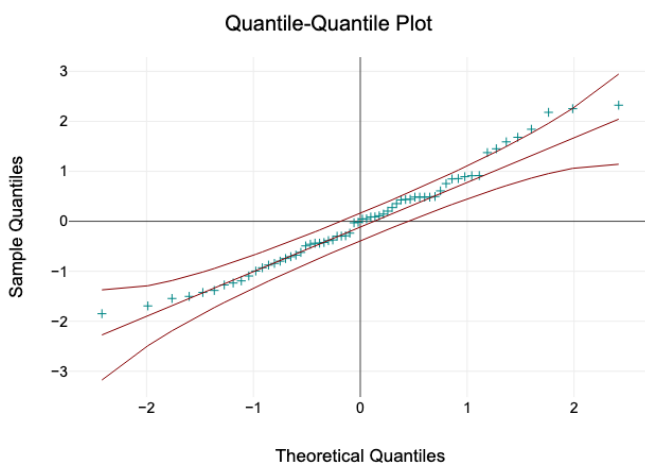

**Q-Q plot of the SOR-LS-NLD angle**

|                |        |
|----------------|--------|
| Mean           | -4.97  |
| Std. Deviation | 10.28  |
| Minimum        | -23.97 |
| Maximum        | 18.9   |

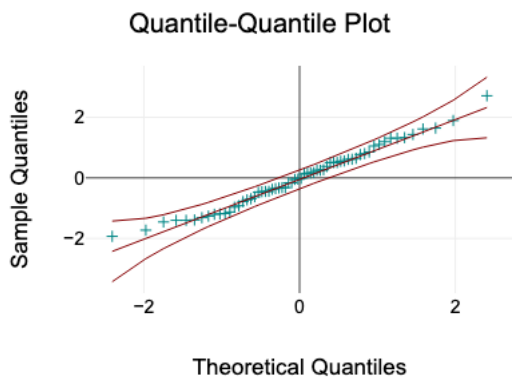

**Q-Q plot of the bNLD length**

|                |       |
|----------------|-------|
| Mean           | 7.95  |
| Std. Deviation | 2.52  |
| Minimum        | 3.09  |
| Maximum        | 14.78 |

---

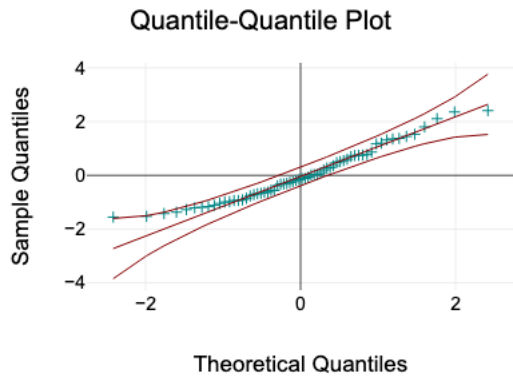

**Q-Q plot of the LS length**

|                |       |
|----------------|-------|
| Mean           | 10.24 |
| Std. Deviation | 2.39  |
| Minimum        | 6.53  |
| Maximum        | 16.01 |

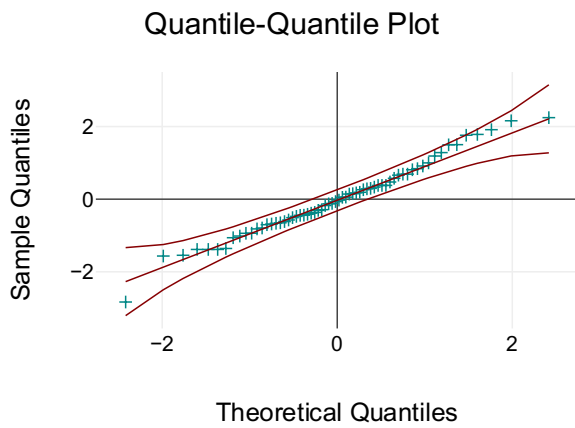

**Q-Q plot of the Frontal LS-NLD angle**

|                |        |
|----------------|--------|
| Mean           | 15.62  |
| Std. Deviation | 11.19  |
| Minimum        | -16.77 |
| Maximum        | 41.04  |

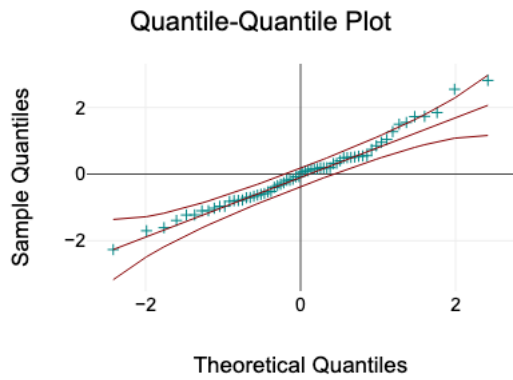

**Q-Q plot of the Frontal Medial-LS angle**

|                |       |
|----------------|-------|
| Mean           | 15.11 |
| Std. Deviation | 5.2   |
| Minimum        | 3.31  |
| Maximum        | 29.76 |

**Supplementary Table 1. Measured values of each parameter assessed in this study.**

| Sex | Age (months) | Laterality | Height (cm) | Weight (Kg) | Lateral LS-NLD angle | NLD angle | SOR-LS-NLD angle | bNLD length (mm) | LS length (mm) | SOR interference | Frontal LS-NLD angle | Frontal medial-LS |
|-----|--------------|------------|-------------|-------------|----------------------|-----------|------------------|------------------|----------------|------------------|----------------------|-------------------|
| M   | 75           | L          | 112.8       | 19.9        | -18.61               | 4.43      | 8.63             | 15.29            | No             | 3.74             | 11.83                |                   |
| M   | 27           | L          | 87          | 13.715      | 10.09                | -4.05     | 9.58             | 14.56            | No             | 10.15            | 13.31                |                   |
| F   | 36           | L          | 103         | 19.9        | -28.17               | -7.41     | 7.84             | 13.54            | No             | 17.66            | 13.51                |                   |
| M   | 69           | L          | 114.5       | 16.1        | -27.47               | -5.28     | 8.9              | 12.1             | No             | 24.01            | 18.97                |                   |
| M   | 36           | R          | 94          | 14.45       | 3.49                 | -10.03    | 9.49             | 11.68            | No             | 27.61            | 20.53                |                   |
| M   | 72           | R          | 110.8       | 20.65       | -9.83                | -1.34     | 12.72            | 12.01            | No             | 14.01            | 14.14                |                   |
| M   | 33           | R          | 91          | 14.95       | 5.55                 | -5.17     | 7.14             | 10.73            | No             | 0.31             | 7.86                 |                   |
| M   | 81           | L          | 115         | 20.8        | -32.57               | -13.63    | 6.83             | 7.87             | No             | 33.37            | 17.65                |                   |
| M   | 29           | R          | 87.1        | 13.16       | 46.55                | 18.9      | 8.36             | 10.33            | Yes            | 0                | 12.4                 |                   |
| M   | 14           | L          | 76.5        | 9.7         | 15.26                | -8.94     | 10.72            | 6.53             | No             | 15.74            | 24.14                |                   |
| F   | 28           | R          | 90.2        | 13.5        | 11.73                | 13.95     | 7.82             | 7.58             | Yes            | 11.82            | 10.85                |                   |
| M   | 84           | L          | 119.2       | 19.3        | -1.26                | -9.47     | 4.45             | 11.56            | No             | 18.23            | 15.4                 |                   |
| M   | 44           | R          | 104         | 17.05       | 32.26                | 4.4       | 4.42             | 8.91             | Yes            | 30.89            | 23.18                |                   |
| M   | 19           | R          | 86.7        | 12.365      | 19.27                | 17.43     | 6.12             | 9.7              | Yes            | 15.27            | 11.45                |                   |
| M   | 35           | L          | 94.6        | 14          | 0                    | -0.48     | 9.22             | 9.97             | No             | -1.86            | 9.78                 |                   |
| M   | 74           | R          | 107.3       | 16.9        | 16.46                | -7.95     | 8.34             | 15.89            | Yes            | 14.54            | 11.05                |                   |
| M   | 24           | R          | 82          | 11.4        | -14.52               | -0.44     | 8.39             | 6.85             | No             | 33.42            | 29.76                |                   |
| F   | 19           | R          | 84.3        | 12.16       | -5.84                | -8.02     | 4.95             | 12.32            | No             | 36.69            | 16.1                 |                   |
| M   | 18           | L          | 75.6        | 10.25       | -10.41               | -2.15     | 7.54             | 10.09            | No             | 8.34             | 15.63                |                   |
| F   | 44           | L          | 90          | 14.15       | 0                    | -13.97    | 9.36             | 8.65             | No             | 7.89             | 8.72                 |                   |
| F   | 24           | L          | 82          | 11.7        | 0                    | 0         | 8.26             | 7.41             | No             | 10.88            | 11.65                |                   |
| M   | 82           | L          | 114.9       | 21.2        | 7.12                 | -2.88     | 11.3             | 9.53             | No             | 0                | 9.37                 |                   |
| F   | 24           | L          | 79.2        | 9.27        | 11.19                | -13.17    | 4.28             | 7.2              | No             | 11.57            | 16.09                |                   |
| M   | 39           | R          | 91.5        | 14.3        | 4.09                 | 2.78      | 4.99             | 7.46             | Yes            | 8.49             | 9.39                 |                   |
| F   | 19           | R          | 75.1        | 8.63        | 0                    | -20.84    | 5.11             | 6.6              | No             | 41.04            | 28.37                |                   |
| M   | 24           | R          | 82          | 10.3        | -16.95               | 4.2       | 5.63             | 7.36             | No             | 4.28             | 3.31                 |                   |
| M   | 23           | R          | 84          | 12.22       | -2.86                | 11.36     | 9.5              | 6.97             | Yes            | 11.21            | 14.31                |                   |
| F   | 28           | L          | 86.1        | 11.9        | -44.55               | 12.3      | 3.09             | 10.29            | No             | 12.69            | 13.05                |                   |
| F   | 21           | R          | 79.4        | 10.22       | -11.58               | 9.94      | 6.82             | 10.32            | Yes            | 18.04            | 17.68                |                   |
| M   | 19           | R          | 84.3        | 11.45       | -6.08                | -9.69     | 3.6              | 8.01             | No             | 25.42            | 16.13                |                   |

|   |    |   |       |        |        |        |       |       |     |        |       |
|---|----|---|-------|--------|--------|--------|-------|-------|-----|--------|-------|
| F | 24 | L | 82.5  | 11.65  | -15.07 | -22.37 | 6.75  | 8.92  | No  | 17.78  | 12.07 |
| M | 20 | L | 79    | 10.755 | 0      | -4.46  | 5.98  | 12.05 | No  | 0      | 11.42 |
| M | 18 | L | 80    | 10.2   | 30.44  | -9.33  | 4.42  | 9.86  | Yes | 10.93  | 17.95 |
| M | 74 | R | 110.6 | 18     | -7.08  | -8.04  | N/A   | 11.47 | No  | 16.62  | 15.94 |
| M | 25 | L | 88.2  | 13.35  | 21.03  | 0      | N/A   | 8.06  | No  | 8.89   | 12.33 |
| M | 23 | R | 84.4  | 12.12  | -17.35 | -19.61 | 11.25 | 7.9   | No  | 14.68  | 17.72 |
| F | 37 | L | 93.2  | 14.05  | 14.58  | -4.09  | 11.56 | 13.91 | No  | 20.42  | 19.54 |
| M | 58 | R | 106.5 | 17.2   | -17.1  | 0.13   | 9.23  | 13.49 | No  | -2.1   | 6.25  |
| F | 32 | R | 84.5  | 9.3    | 3.9    | -14.52 | 5.51  | 11.11 | No  | 6.55   | 14.69 |
| F | 28 | R | 83.6  | 10.15  | -1.49  | -16.21 | 7.91  | 9.32  | No  | 38.2   | 24.1  |
| M | 18 | R | 79    | 10     | -6.99  | 9.15   | 4.77  | 8.76  | Yes | N/A    | 20.08 |
| M | 18 | L | 83.8  | 12.15  | -0.77  | -17.66 | 11.25 | 7.75  | No  | 19.88  | 15.59 |
| M | 18 | L | 76.4  | 10.33  | -33.51 | -15.2  | 4.92  | 8.61  | No  | 36.43  | 17.78 |
| M | 37 | R | 92.6  | 13     | -14.76 | -19.19 | 12.09 | 9.8   | No  | 29.8   | 16.76 |
| F | 33 | R | 89.8  | 11.85  | -4.42  | 3.81   | 14.78 | 13.05 | No  | -16.77 | 10.08 |
| F | 32 | R | 92.6  | 15.1   | 0.8    | 18.18  | 6.38  | 8.01  | Yes | 6.84   | 14.15 |
| M | 36 | L | 93.8  | 13.5   | 28     | 1.28   | 6.21  | 13.11 | Yes | 26.62  | 11.95 |
| M | 18 | L | 78.5  | 11.1   | -7.01  | -12.63 | 8.58  | 12.03 | No  | 5.15   | 8.73  |
| F | 35 | R | 95    | 13.1   | 15.07  | 0      | 10.1  | 9.97  | Yes | 12.47  | 10.96 |
| M | 28 | R | 85.4  | 12.6   | -3.4   | -12.25 | 7.06  | 9.62  | No  | 19.33  | 13.75 |
| F | 24 | R | 88    | 14.3   | -20.64 | -17.22 | 9.97  | 13.71 | No  | 8.12   | 10.98 |
| M | 70 | L | 110   | 19.7   | -4.82  | -9.47  | 9.89  | 11.92 | No  | 16.69  | 15.87 |
| M | 23 | R | 81.5  | 11.12  | 12.34  | -11.93 | 9.23  | 9.47  | No  | 10.55  | 16.82 |
| M | 33 | L | 93.4  | 15.25  | 0      | 0      | 10.96 | 13.4  | No  | 19.05  | 17.99 |
| M | 22 | R | 82.7  | 12.7   | 12.29  | -4.51  | 4.64  | 10.5  | No  | 23.69  | 21.75 |
| M | 18 | R | 84.8  | 11.65  | 10.18  | -8.81  | 7.14  | 11.38 | Yes | 5.18   | 6.73  |
| F | 21 | R | 80.3  | 11.4   | -6.63  | -0.58  | 8.58  | 10.89 | No  | 20.43  | 15.9  |
| F | 20 | R | 81    | 11.1   | 0      | -20.41 | 12.02 | 8.41  | No  | 25.76  | 14.73 |
| F | 24 | R | 81.7  | 11.9   | -26.78 | -18.06 | 7.11  | 8.53  | No  | 21.51  | 17.2  |
| F | 28 | R | 87.9  | 13.8   | 11.66  | -3.84  | 7     | 8.72  | Yes | 22.69  | 16.1  |
| M | 46 | R | 96    | 14.15  | 0      | -11.37 | 7.53  | 10.92 | No  | 24.02  | 22.91 |
| M | 17 | R | 77.3  | 9.7    | 8.26   | 3.74   | 6.8   | 8.21  | Yes | 9.4    | 17.9  |
| F | 56 | L | 95.5  | 12.8   | 0      | -3.49  | 10.6  | 16.01 | No  | 19.48  | 10.08 |
| F | 19 | L | 85    | 10.595 | -12.02 | -23.97 | 9.33  | 9.48  | No  | 20.41  | 24.73 |
